# Supplementary material
Source: ML conference proceedings conference paper supplement (https://aclanthology.org/N18-2084)
Supplement: Software [file experiment_setting_specification.xlsx]

## Sheet: Q1
Q1: Efficacy of Pre-training
group	sec	source language	target language	pretrain source	pretrain target
1	1	gl	en	no	no
	2	gl	en	yes	no
	3	gl	en	no	yes
	4	gl	en	yes	yes
2	1	pt	en	no	no
	2	pt	en	yes	no
	3	pt	en	no	yes
	4	pt	en	yes	yes
3	1	az	en	no	no
	2	az	en	yes	no
	3	az	en	no	yes
	4	az	en	yes	yes
4	1	tr	en	no	no
	2	tr	en	yes	no
	3	tr	en	no	yes
	4	tr	en	yes	yes
5	1	be	en	no	no
	2	be	en	yes	no
	3	be	en	no	yes
	4	be	en	yes	yes
6	1	ru	en	no	no
	2	ru	en	yes	no
	3	ru	en	no	yes
	4	ru	en	yes	yes

## Sheet: Q2
Q2: Effect of Training Data Size
group	sec	source language	target language	train size	pretrain
1	1	pt	en	2017-01-02	no
	2	pt	en	2017-01-02	yes
	3	pt	en	2017-01-04	no
	4	pt	en	2017-01-04	yes
	5	pt	en	2017-01-08	no
	6	pt	en	2017-01-08	yes
2	1	tr	en	2017-01-02	no
	2	tr	en	2017-01-02	yes
	3	tr	en	2017-01-04	no
	4	tr	en	2017-01-04	yes
	5	tr	en	2017-01-08	no
	6	tr	en	2017-01-08	yes
3	1	ru	en	2017-01-02	no
	2	ru	en	2017-01-02	yes
	3	ru	en	2017-01-04	no
	4	ru	en	2017-01-04	yes
	5	ru	en	2017-01-08	no
	6	ru	en	2017-01-08	yes

## Sheet: Q3
Q3: Effect of Language Similarity
group	sec	source language	target language	pretrain
1	1	es	pt	no
	2	es	pt	yes
2	1	fr	pt	no
	2	fr	pt	yes
3	1	it	pt	no
	2	it	pt	yes
4	1	en	pt	no
	2	en	pt	yes
5	1	ru	pt	no
	2	ru	pt	yes
6	1	he	pt	no
	2	he	pt	yes

## Sheet: Q4
Q4: Effect of Word Embedding Alignment
group	sec	source language	target language	align
1	1	gl	en	svd
	2	pt	en	svd
	3	az	en	svd
	4	tr	en	svd
	5	be	en	svd
	6	ru	en	svd

## Sheet: Q5
Q5: Effect of Multilinguality
group	sec	train source language	eval source language	target language	pretrain	align
1	1	pt+gl	gl	en	no	-
	2	pt+gl	gl	en	yes	no
	3	pt+gl	gl	en	yes	yes
2	1	ru+be	be	en	no	-
	2	ru+be	be	en	yes	no
	3	ru+be	be	en	yes	yes
3	1	tr+az	az	en	no	-
	2	tr+az	az	en	yes	no
	3	tr+az	az	en	yes	yes
